# Supplementary material
Source: PubMed Central journal article supplement (PMC5009997)
Supplement: supp_msv256_Resubmission_SOM_2015_figures_and_tables_v11.pdf [file supp_msv256_Resubmission_SOM_2015_figures_and_tables_v11.pdf]

## SUPPLEMENTARY FIGURE LEGENDS

Figure S1. Geographic distribution for eight SNPs in the Human Genome Diversity Project (HGDP) populations. The derived (and selected) allele is represented in orange (except for rs16891982 for which the derived and selected allele is represented in blue). (A) rs6822844, (B) rs3184504, (C) rs12913832, (D) rs4988235, (E) rs1426654, (F) rs16891982, (G) rs17810546, and (H) rs2188962. The maps were obtained from the HGDP Selection Bowser.

(A)

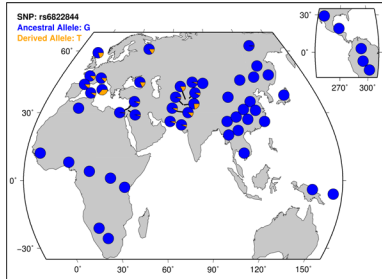

(B)

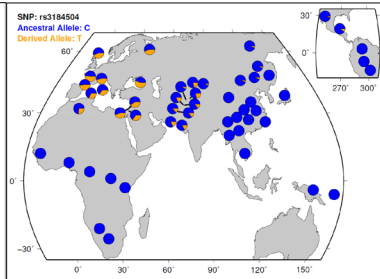

(C)

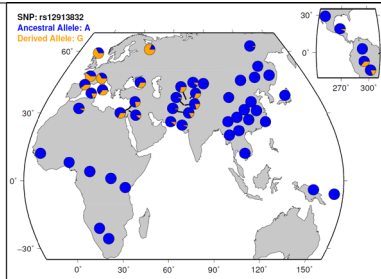

(D)

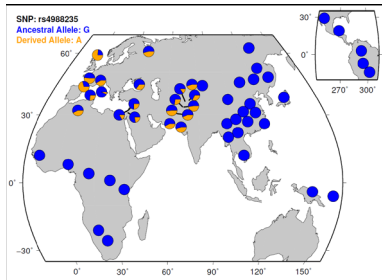

(E)

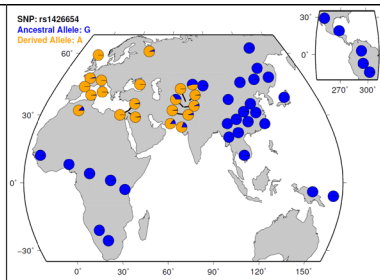

(F)

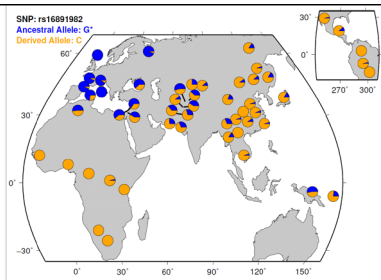

(G)

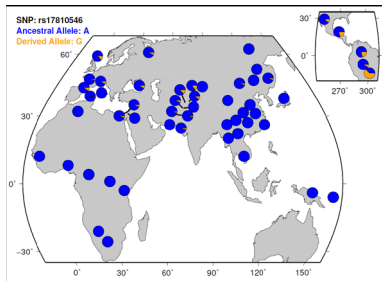

(H)

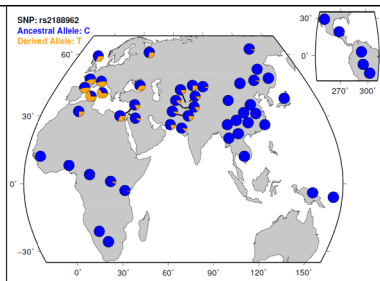

Figure S2. Genetic map of the eight studied regions. The genomic position and the recombination rate (cM/Mb) are represented on the x- and y-axis, respectively. The regions for which the capture array was designed is shown for SNPs rs6822844, rs3184504 and rs12913832 while a 1Mb region centered on the focal SNP is shown for the 5 SNPs analyzed using only the GC data. The blue area represents the subregions chosen for simulations and for allele age estimation. The red solid line marks the position of the SNPs associated with the selection signal.

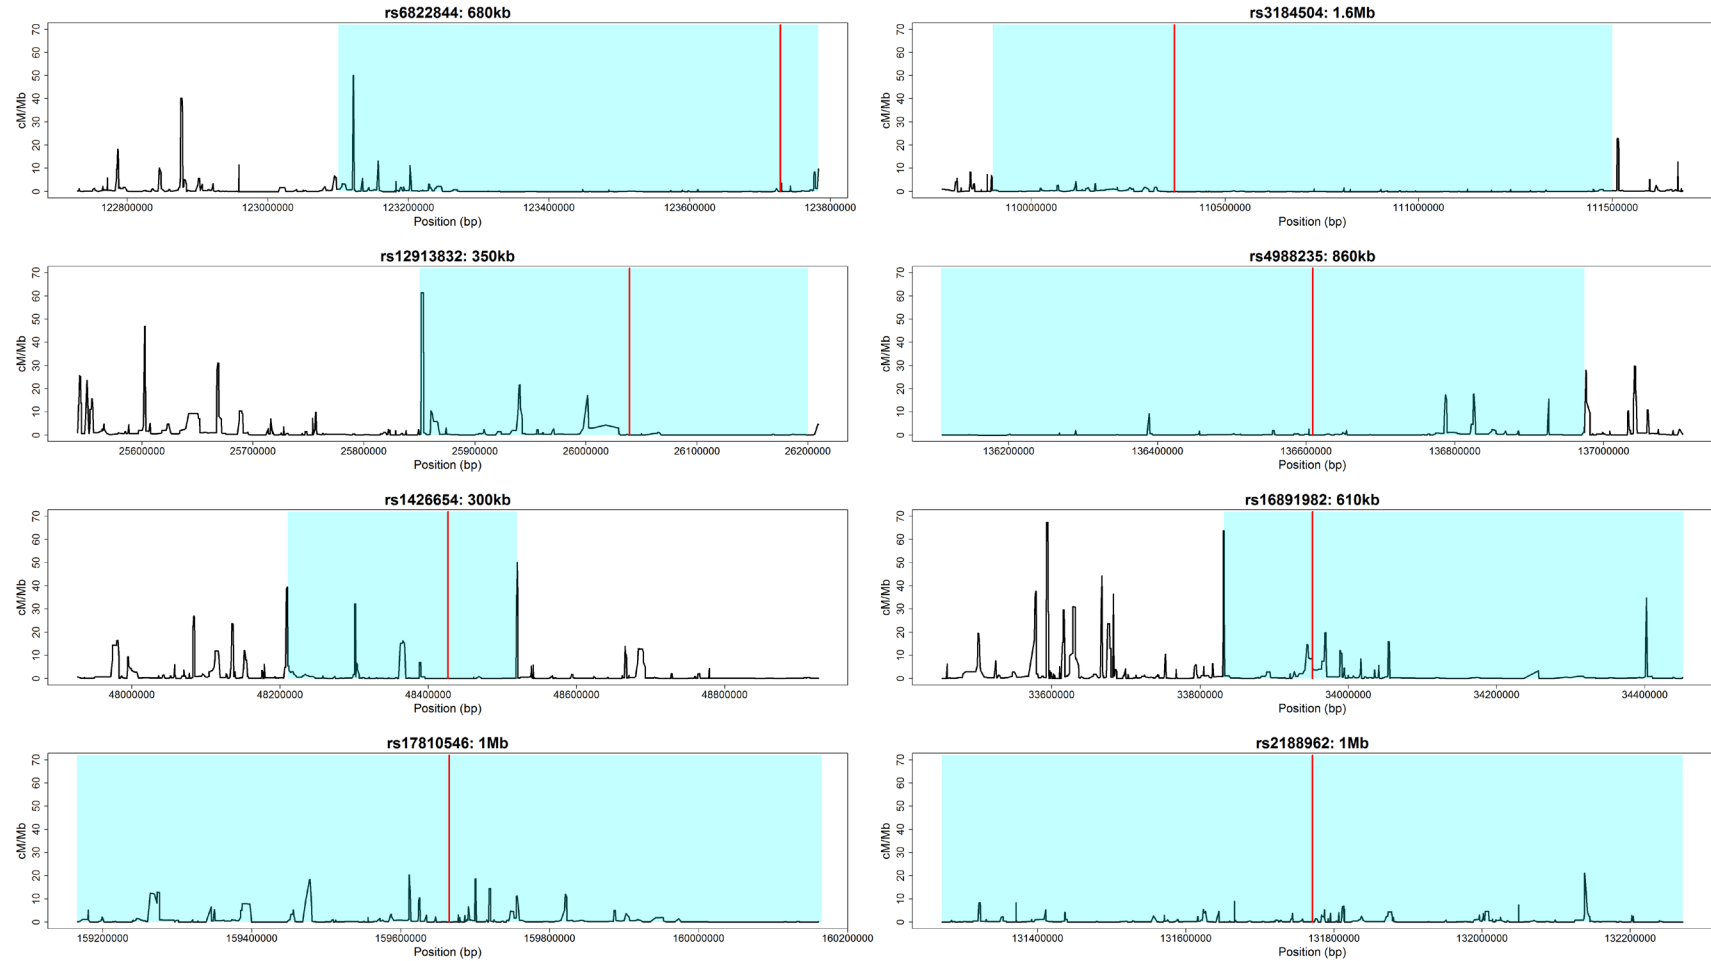

Figure S3. Coverage plots of 14 samples within the regions including rs6822844 (A), rs3184504 (B) and rs12913832 (C) targeted regions. Per region, two plots are shown. In both cases, the x-axis represents the positions within the targeted region while the y-axis represents the median read coverage and the number of genotypes called within the top and bottom plots, respectively. Lines of different colors represent the median coverage for each continuous sequenced region – separated by gaps – for each sample. In the bottom portion, the black and red lines represent all observed variants and variants that passed the filters, respectively.

(A) rs6822844

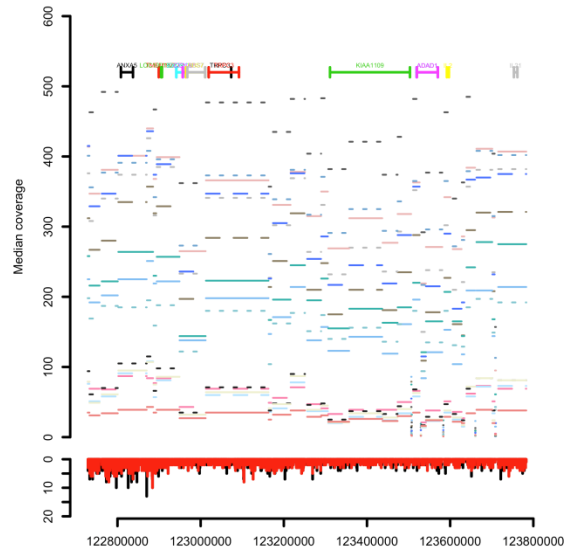

(B) rs3184504

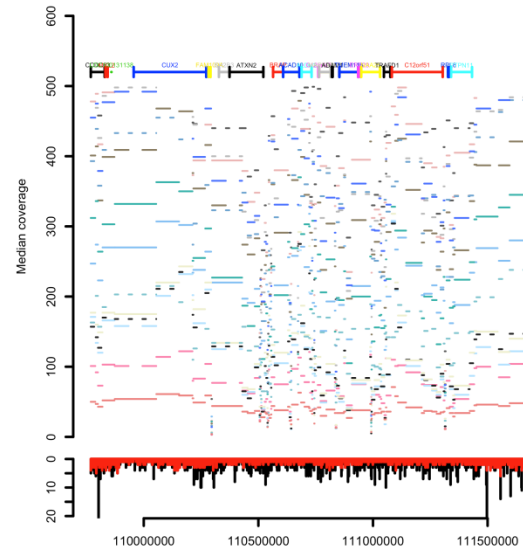

(C) rs12913832

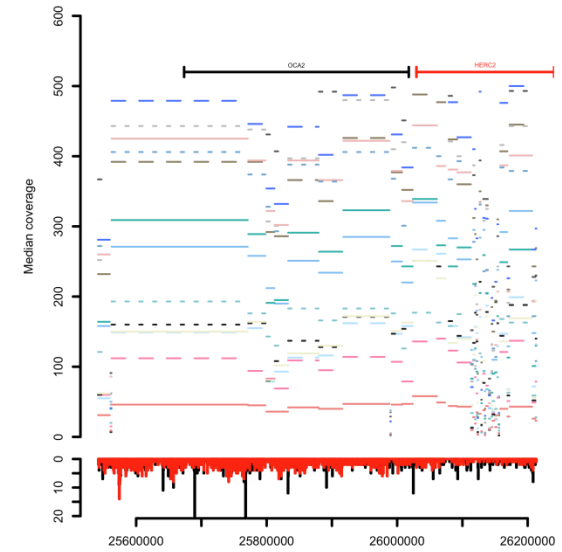

Figure S4. Histogram representing the allele imbalance at heterozygous positions in the regions spanning rs6822844 (A), rs3184504 (B) and rs12913832 (C). The reference genome was used to design the captured array oligos and to align the reads; as a result, reads carrying the reference allele are favored causing a slight allelic imbalance at heterozygous positions (~53% of the reads carried the reference allele at heterozygous positions). All observed heterozygous positions are represented in blue while the ones in orange represent the positions that were called heterozygous in the HapMap data.

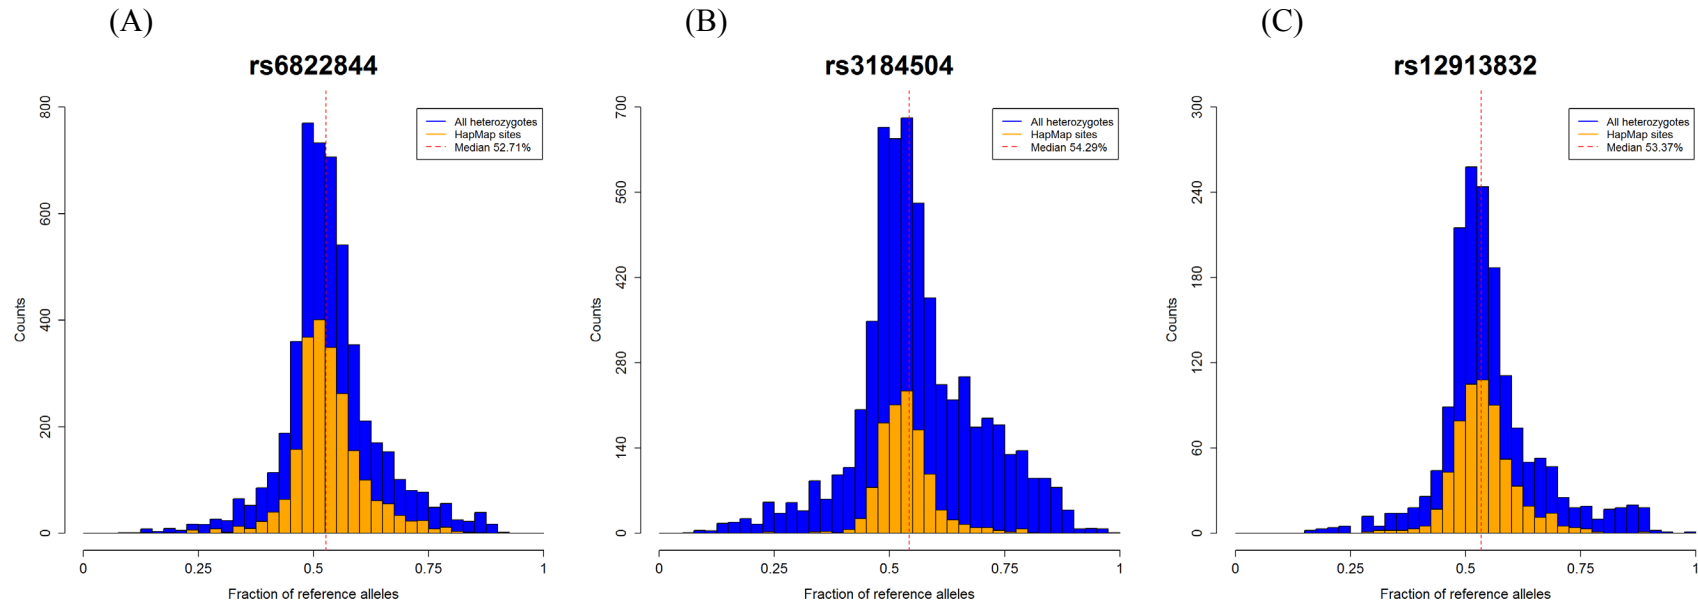

Figure S5. Venn diagrams of segregating sites among the six individuals typed in the CapSeq (orange) and the CG (blue) data sets. These counts were obtained from the targeted subregions spanning rs6822844 (A), rs3184504 (B) and rs12913832 (C). Numbers outside the circles show the total number of segregating sites in each data set.

(A) rs6822844

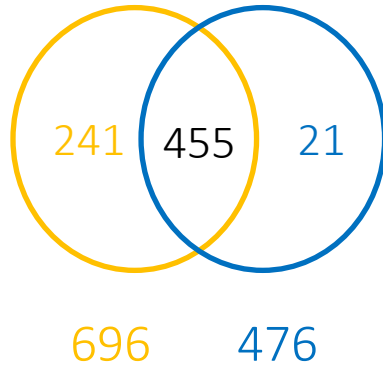

(B) rs3184504

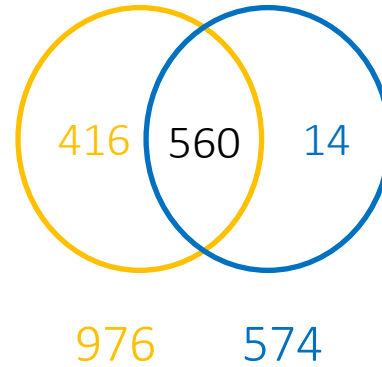

(C) rs12913832

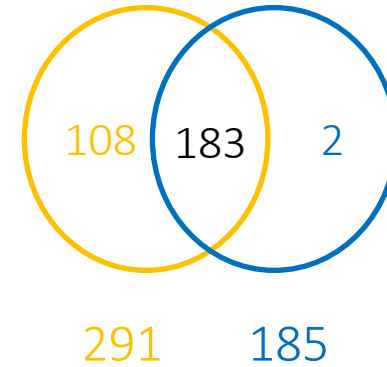

Figure S6. Site-frequency spectra (SFS) for the six individuals typed in the CapSeq and CG data sets. Blue bars represent the SFS of variants detected by both CapSeq and CG data while orange bars those detected by CapSeq but not CG data (Figure S5) for rs6822504 (A), rs3184504 (B) and rs12913832 (C). The x-axis shows the number of copies of alleles observed at a site and the y-axis the fraction of sites in each allele frequency class.

(A) rs6822844

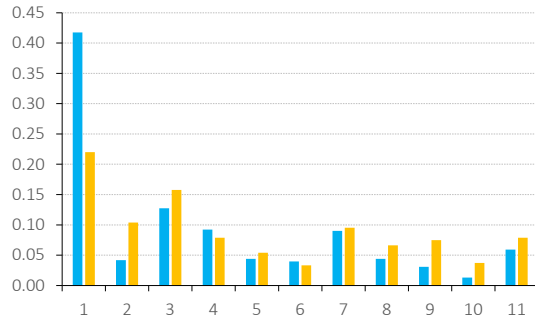

(B) rs3184504

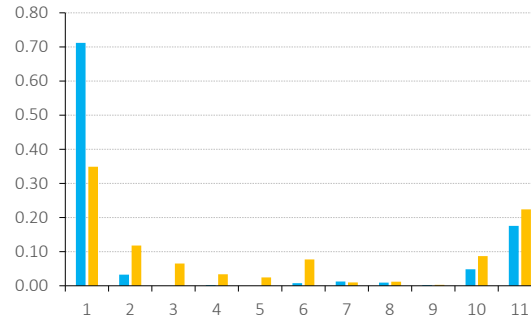

(C) rs12913832

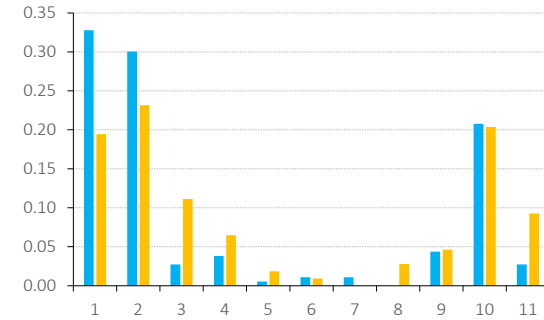

Figure S7. Boxplot of  $\log_2$  ratio of the estimated to the true age of the allele to assess the sensitivity of the age estimation to demographic history, sample size, unsurveyed subregions and phasing uncertainty. The performance of the ABC method of simulated selection events at four time points ( $t$ ) 2000 (D, H, L), 1200 (C, G, K), 800 (B, F, J) and 400 (A, E, I) generations ago representing pre-bottleneck, bottleneck, recovery and expansion periods are shown for the three SNPs for which we collected ultra-high depth sequence data. Blue boxplots refer to the actual data while orange boxplots refer to data with sample size  $n = 128$ , green boxplots refer to data without gaps and red boxplots refer to data without phasing uncertainty (see Text S4 for more details).

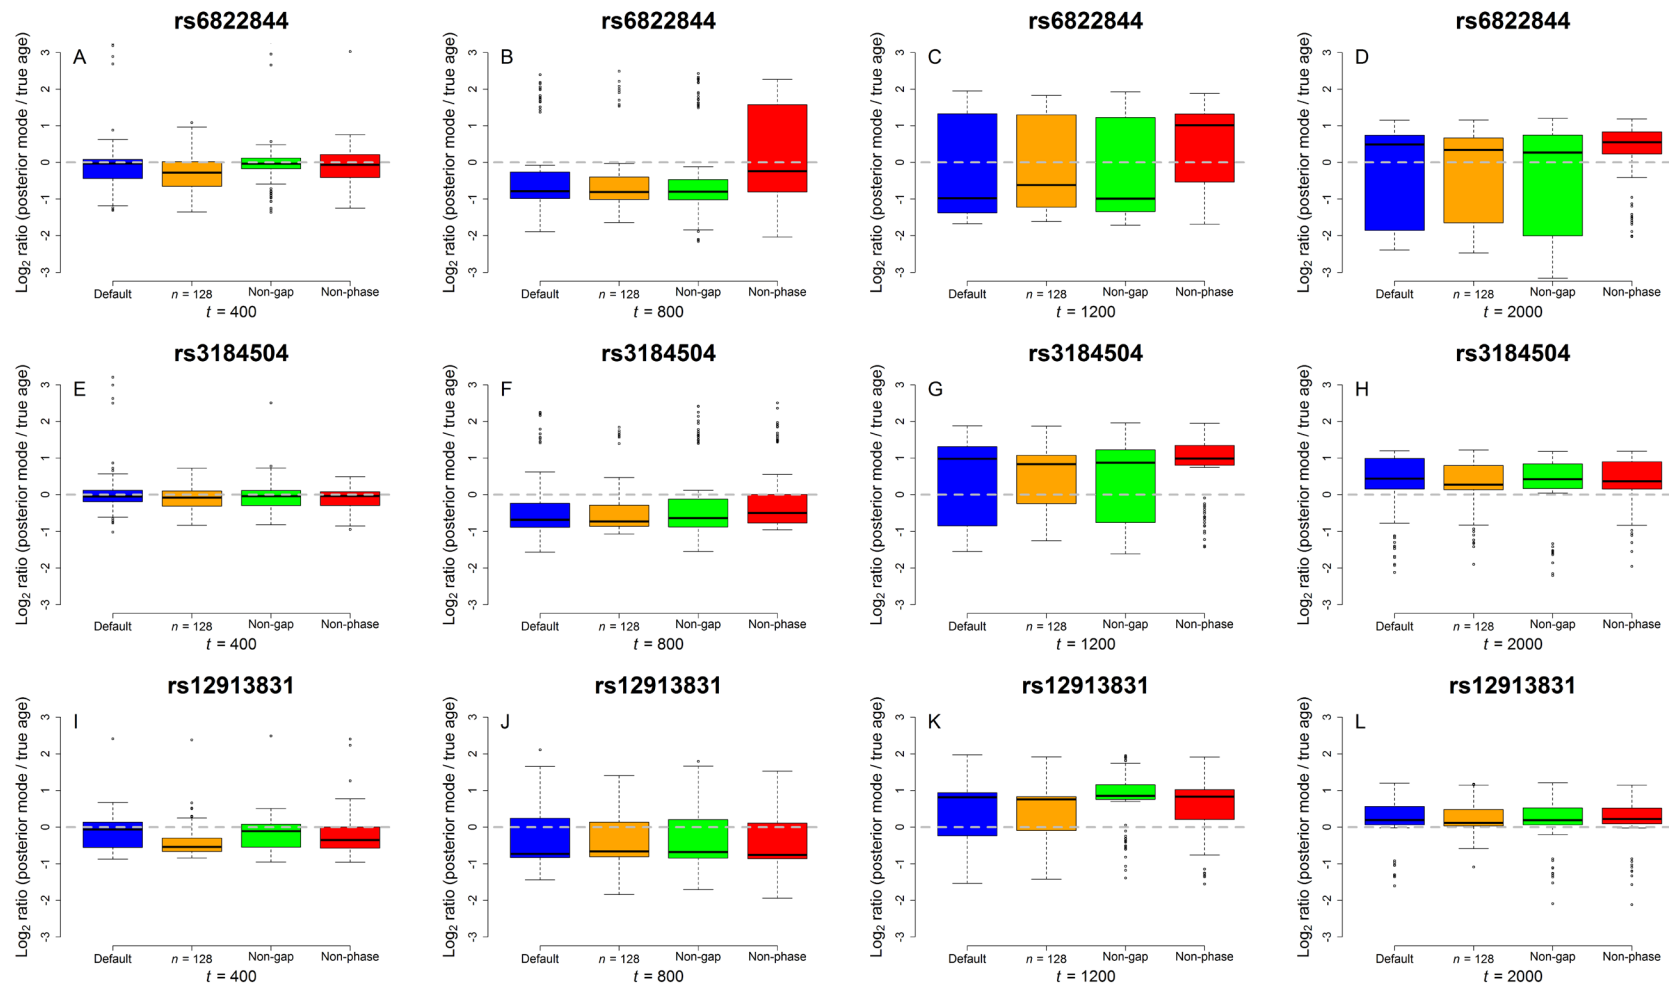

Figure S8. Posterior density distributions of the selection coefficients and the age of the selected alleles with the joint density plot for these two parameters for the CapSeq (orange) and the CG (blue) data sets. From left to right, the plots show the results for rs6822844, rs3184504 and rs12913832, respectively.

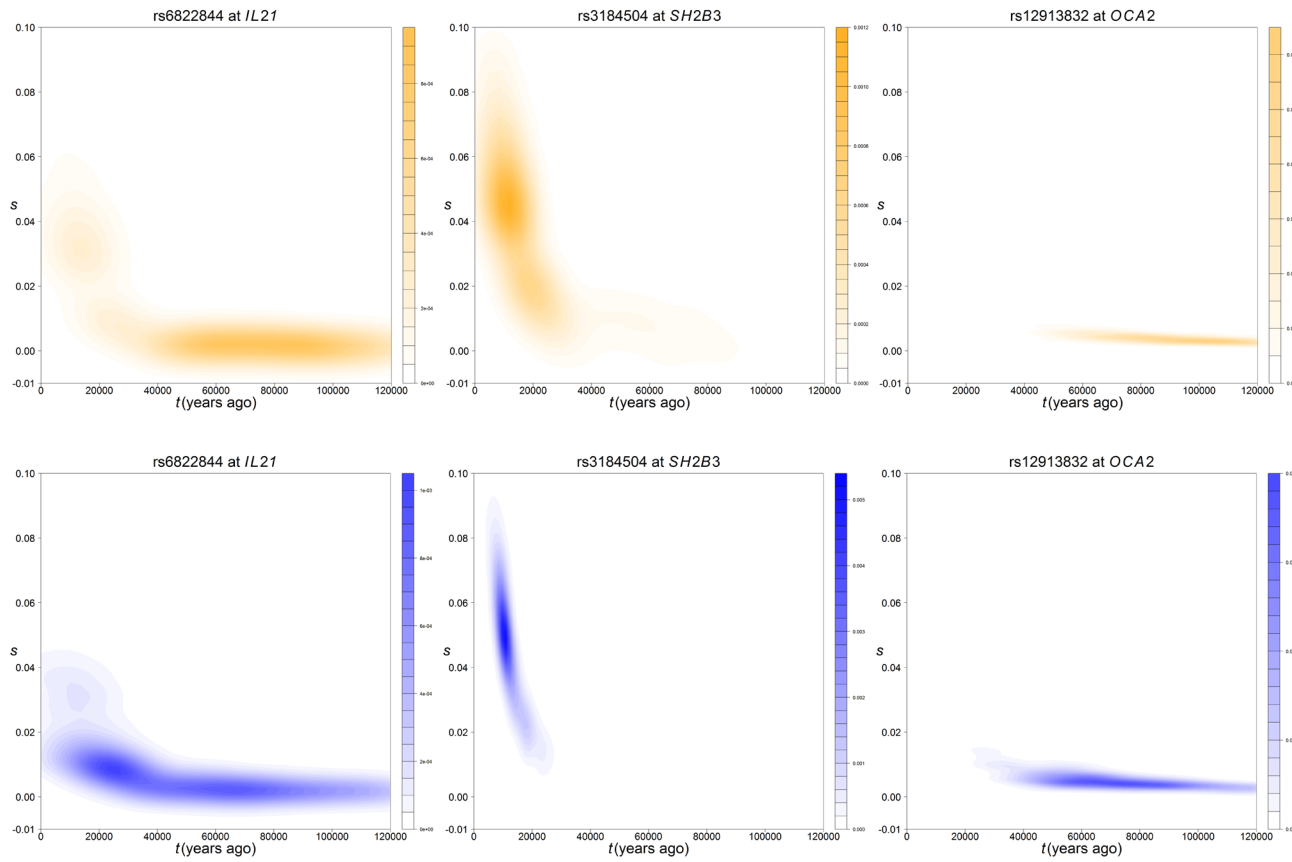



Figure S9. Posterior predictive checks for the ABC method for the 3 CapSeq regions. This figure compares the observed and simulated summary statistics ( $SSs$ ) for the targeted subregions for the CapSeq (orange) and the CG (blue) data sets. The distribution of the  $SSs$  estimated in the simulated data is shown for (i) the inverse of the genetic distance in the selected region ( $1/L_H$ ), (ii) the average number of mutations accumulated in the haplotypes carrying the selected alleles divided by the physical distance in the selected region ( $M_H$ ) and (iii) the number of singleton variants divided by the total number of segregating sites in these haplotypes ( $R_H$ ), respectively for the rs6822844 (upper), rs3184504 (middle) and rs12913832 (lower). The horizontal red line indicates the value of the corresponding  $SS$  observed in the CapSeq data, and the horizontal dashed black lines represent the 95% confidence interval (CI).

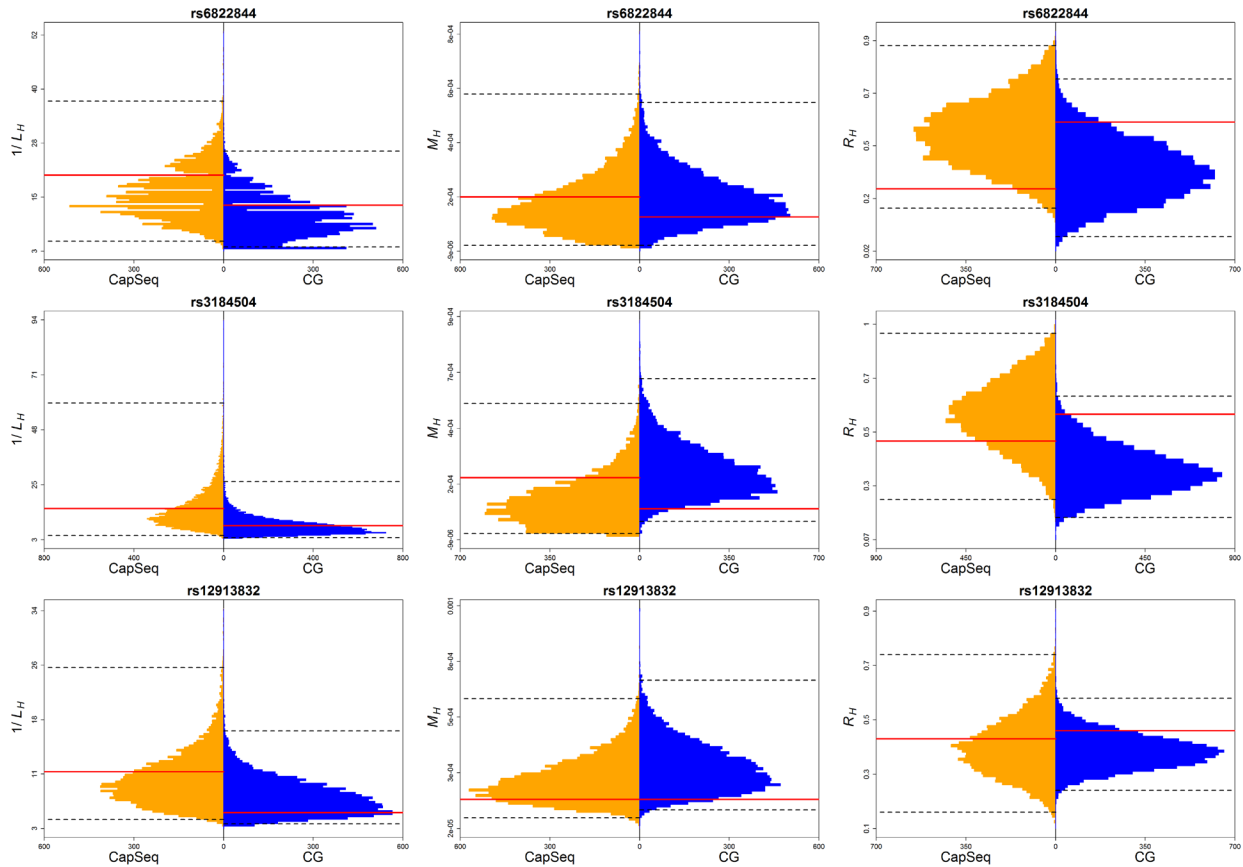

Figure S10. Posterior predictive checks for the ABC method. This figure compares the observed and simulated summary statistics ( $SS$ s) for the five SNPs analyzed using only the CG data. Each row represents the distributions of three  $SS$ s ( $1/L_H$ ,  $M_H$ , and  $R_H$ ) from one SNP. The red line indicates the value of the corresponding observed  $SS$ , and the dashed black lines represent the 95% confidence interval (CI).

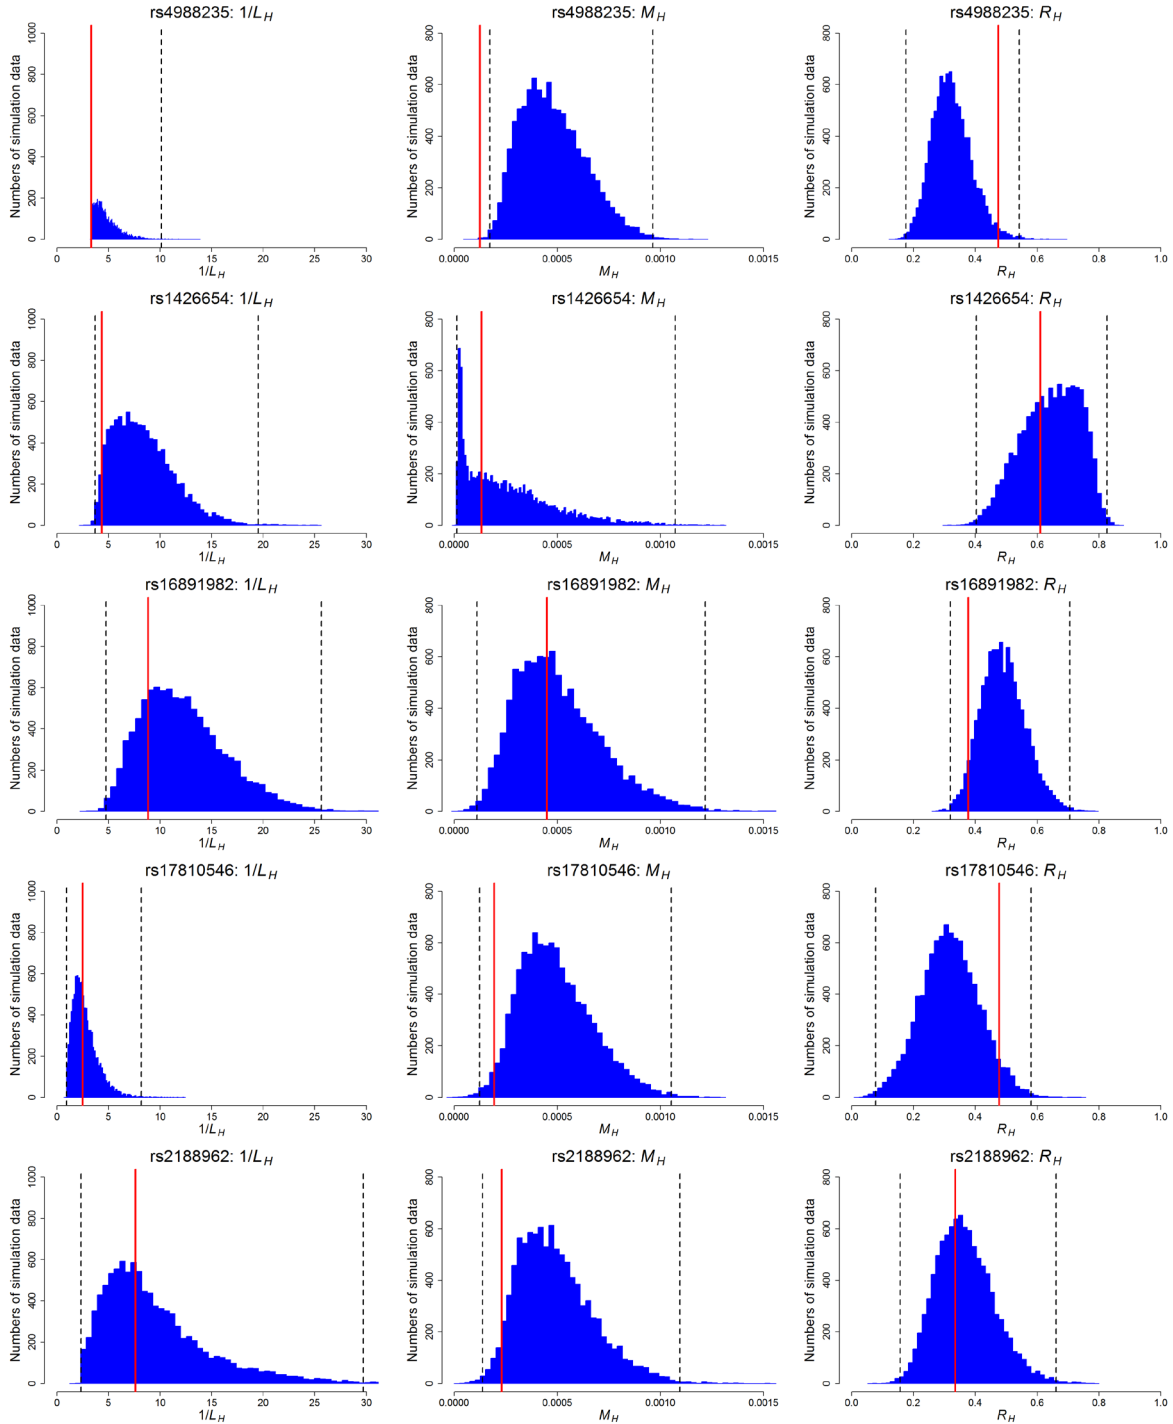

Figure S11. Comparison of the posterior probability distributions for  $t$  of rs4988235, rs17810546 and rs3181504 obtained using a prior distribution with density proportional to  $N$  vs. a uniform prior between 10 and 5000 generations ago.

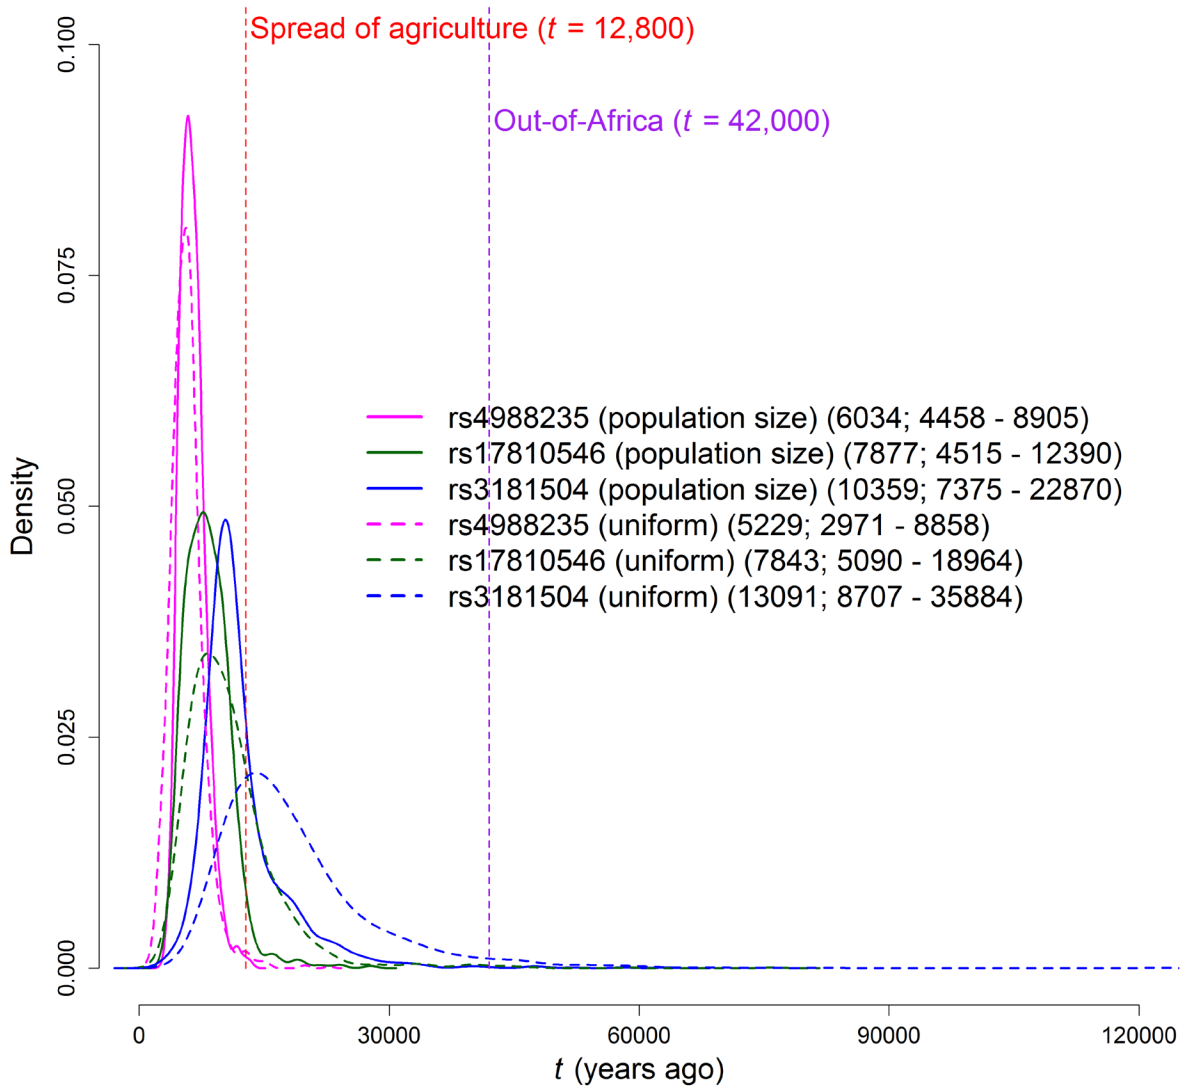

Figure S12. Joint posterior distributions of  $t$  (x-axis) and  $s$  (y-axis) for the five SNPs analyzed using only the CG data (rs4988235, rs1426654, rs16891982, rs17810546 and rs2188962).

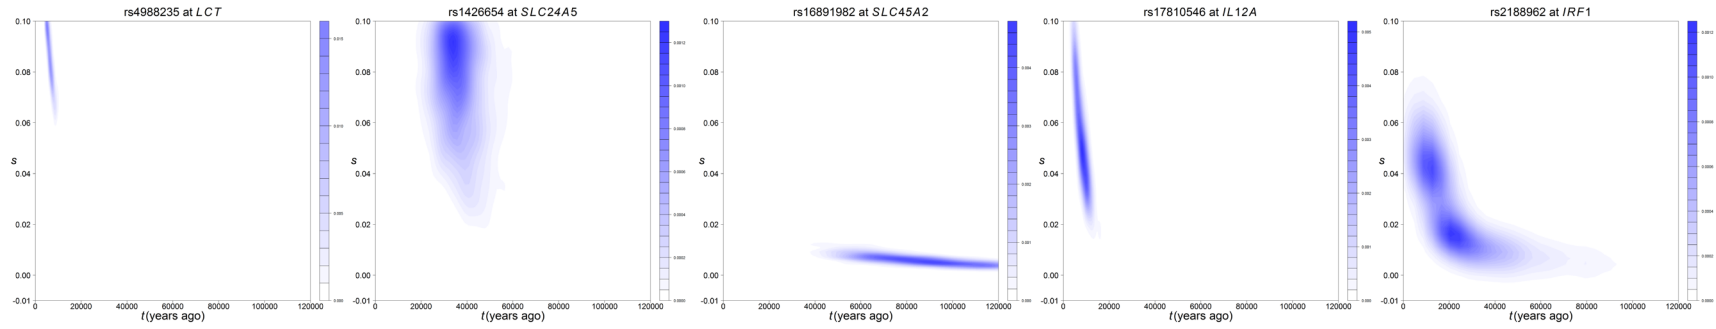

## SUPPLEMENTARY TABLES

Table S1. Summary information of the sequenced CEU samples. The Coriell ID and the genotypes of the corresponding targeted SNPs are indicated. The targeted allele is T for rs6822844 and rs3184504 and G for rs12913832, respectively.

| Coriell ID | rs6822844 | rs3184504 | rs12913832 |
|------------|-----------|-----------|------------|
| NA10839    | TT        | CT        | GG         |
| NA10864    | GT        | TT        | AG         |
| NA11881    | GT        | TT        | GG         |
| NA12144    | GT        | TT        | AG         |
| NA12248    | TT        | TT        | AG         |
| NA12748    | TT        | CT        | GG         |
| NA12762    | GT        | TT        | GG         |
| NA07031    | GT        | CT        | GG         |
| NA10855    | GT        | CT        | GG         |
| NA11830    | GT        | CT        | GG         |
| NA11839    | GT        | CT        | GG         |
| NA12489    | GT        | CT        | GG         |
| NA12874    | GT        | CT        | GG         |
| NA12891    | GT        | CT        | GG         |

Table S2. Summary information of the array captured targeted regions spanning rs6822844, rs3184504 and rs12913832. The start and end positions of the targeted regions are given with reference to build 36.

| Parameters                                                 | rs6822844 | rs3184504 | rs12913832 |
|------------------------------------------------------------|-----------|-----------|------------|
| Start position                                             | 122729299 | 109769404 | 25542017   |
| End position                                               | 123782528 | 111681303 | 26213429   |
| Size of the targeted region (bp)                           | 1053229   | 1911899   | 671412     |
| Size of the region covered by oligos (bp)                  | 836589    | 1283878   | 503616     |
| Size of the area not covered by oligos (i.e., gap) (bp)    | 216715    | 628086    | 167861     |
| gap size/targeted region size                              | 0.21      | 0.33      | 0.25       |
| Number of small gaps (i.e., <400bp)                        | 1274      | 2598      | 908        |
| Average size of continuous segment targeted by oligos (bp) | 657       | 494       | 555        |
| Average gap size (bp)                                      | 170       | 242       | 185        |
| %A+T                                                       | 0.64      | 0.56      | 0.57       |

Table S3. Statistics of sequence reads per sample. For each sample the total number of reads is reported as well as the percentage of the reads left when duplicates were removed (non-redundant reads). In addition, the observed coverage per base averaged across individuals is given on the last row.

| Coriell_ID | No. of reads | % non-redundant reads | % of non-redundant reads aligned to targeted region |           |            | Average coverage per sample |           |            |
|------------|--------------|-----------------------|-----------------------------------------------------|-----------|------------|-----------------------------|-----------|------------|
|            |              |                       | rs6822844                                           | rs3184504 | rs12913832 | rs6822844                   | rs3184504 | rs12913832 |
| NA10864    | 66,612,726   | 34                    | 2.2                                                 | 5.6       | 2.2        | 31.2                        | 44.8      | 44.1       |
| NA12144    | 67,897,518   | 53                    | 3.3                                                 | 9.3       | 4.4        | 83.3                        | 127.5     | 162.7      |
| NA11830    | 70,014,962   | 46                    | 3.5                                                 | 13.5      | 6.0        | 80.8                        | 168.2     | 209.9      |
| NA11839    | 71,423,260   | 42                    | 4.3                                                 | 15.2      | 6.5        | 91.5                        | 174.9     | 210.3      |
| NA12489    | 67,098,136   | 32                    | 5.1                                                 | 19.9      | 8.0        | 78.3                        | 168.2     | 190.8      |
| NA10839    | 64,011,962   | 85                    | 5.2                                                 | 10.8      | 4.0        | 192.6                       | 216.5     | 218.1      |
| NA10855    | 73,994,098   | 62                    | 7.0                                                 | 16.7      | 6.3        | 227.1                       | 293.4     | 310.6      |
| NA12748    | 65,299,828   | 58                    | 7.5                                                 | 19.5      | 7.9        | 198.0                       | 281.0     | 312.4      |
| NA11881    | 71,681,848   | 71                    | 9.0                                                 | 22.0      | 8.0        | 321.1                       | 425.4     | 426.9      |
| NA07031    | 71,389,744   | 76                    | 9.3                                                 | 19.5      | 7.2        | 355.9                       | 402.2     | 404.7      |
| NA12891    | 72,597,604   | 49                    | 10.7                                                | 27.0      | 10.3       | 269.8                       | 368.8     | 392.2      |
| NA12874    | 73,636,302   | 51                    | 12.3                                                | 30.3      | 11.4       | 326.4                       | 432.6     | 458.5      |
| NA12248    | 71,136,622   | 58                    | 12.5                                                | 31.5      | 10.0       | 362.7                       | 482.2     | 431.4      |
| NA12762    | 73,460,858   | 56                    | 15.5                                                | 33.0      | 12.5       | 448.7                       | 507.8     | 527.1      |
|            | 70,018,248   | 55                    | 7.7                                                 | 19.6      | 7.5        | 219.1                       | 292.39    | 307.12     |

Table S4. Comparison of genotype calls between the CapSeq data and the HapMap data. The genotype calls for all overlapping SNPs between the CapSeq data and the HapMap data are shown. RR denotes homozygote for reference allele; RA: heterozygote; and AA homozygote for the alternative allele.

| Sample  | HapMap RR |    |    | HapMap RA |     |    | HapMap AA |    |     |
|---------|-----------|----|----|-----------|-----|----|-----------|----|-----|
|         | RR        | RA | AA | RR        | RA  | AA | RR        | RA | AA  |
| NA10839 | 1659      | 0  | 2  | 2         | 117 | 1  | 12        | 0  | 263 |
| NA07031 | 403       | 0  | 0  | 0         | 210 | 0  | 0         | 1  | 96  |
| NA10855 | 1457      | 5  | 1  | 0         | 376 | 0  | 9         | 4  | 219 |
| NA11830 | 1621      | 2  | 1  | 0         | 297 | 1  | 11        | 3  | 141 |
| NA11839 | 1501      | 3  | 0  | 1         | 354 | 0  | 7         | 2  | 181 |
| NA12489 | 479       | 0  | 0  | 0         | 140 | 0  | 0         | 0  | 96  |
| NA12874 | 1640      | 1  | 1  | 1         | 206 | 0  | 10        | 3  | 208 |
| NA12891 | 1472      | 1  | 1  | 2         | 378 | 0  | 8         | 5  | 204 |
| NA10864 | 532       | 0  | 0  | 0         | 83  | 0  | 0         | 0  | 96  |
| NA11881 | 1619      | 3  | 1  | 0         | 193 | 0  | 11        | 0  | 226 |
| NA12144 | 1521      | 2  | 1  | 1         | 376 | 0  | 12        | 1  | 146 |
| NA12248 | 1607      | 4  | 1  | 0         | 173 | 0  | 8         | 4  | 275 |
| NA12748 | 534       | 0  | 0  | 0         | 48  | 0  | 0         | 0  | 133 |
| NA12762 | 1648      | 1  | 0  | 0         | 239 | 0  | 11        | 0  | 159 |



Table S5. Detailed information on the mismatches observed when the CapSeq genotype calls were compared to HapMap genotypes. Among the 162 mismatches observed, genotype calls for 68 mismatches shown in the table were available in the Phase 3 1KG data. R denotes reference allele and A alternative allele.

| SAMPLE  | SNP        | R | A | Total coverage | Numbers of reads |     | Genotype calls |        |     |        |
|---------|------------|---|---|----------------|------------------|-----|----------------|--------|-----|--------|
|         |            |   |   |                | R                | A   | CapSeq         | HapMap | 1KG | ERROR  |
| NA11830 | rs10018569 | G | C | 71             | 0                | 71  | CC             | GG     | CC  | HapMap |
| NA11830 | rs1880865  | G | A | 394            | 204              | 190 | GA             | GG     | GA  | HapMap |
| NA11830 | rs955710   | G | T | 20             | 11               | 9   | GT             | GG     | GT  | HapMap |
| NA12874 | rs10018569 | G | C | 219            | 0                | 219 | CC             | GG     | CC  | HapMap |
| NA12874 | rs17005630 | G | A | 300            | 173              | 127 | GA             | GG     | GA  | HapMap |
| NA11881 | rs10018569 | G | C | 163            | 0                | 163 | CC             | GG     | CC  | HapMap |
| NA11881 | rs1880865  | G | A | 878            | 414              | 464 | GA             | GG     | GA  | HapMap |
| NA12144 | rs10018569 | G | C | 62             | 0                | 62  | CC             | GG     | CC  | HapMap |
| NA12144 | rs17005630 | G | A | 23             | 12               | 11  | GA             | GG     | GA  | HapMap |
| NA12762 | rs10018569 | G | C | 232            | 105              | 127 | GC             | GG     | GC  | HapMap |
| NA11830 | rs11065857 | A | G | 273            | 273              | 0   | AA             | GG     | AA  | HapMap |
| NA11830 | rs7978923  | G | T | 129            | 129              | 0   | GG             | TT     | GG  | HapMap |
| NA11830 | rs4572196  | A | G | 385            | 385              | 0   | AA             | GG     | AA  | HapMap |
| NA11830 | rs10774624 | G | A | 35             | 23               | 12  | GA             | AA     | GA  | HapMap |
| NA11830 | rs11065961 | G | A | 95             | 68               | 27  | GA             | AA     | GA  | HapMap |
| NA11830 | rs668774   | G | C | 122            | 121              | 1   | GG             | CC     | GG  | HapMap |
| NA11830 | rs7953257  | A | T | 24             | 10               | 14  | AT             | TT     | AT  | HapMap |
| NA11830 | rs6489845  | G | C | 135            | 1                | 134 | CC             | CG     | CC  | HapMap |
| NA11830 | rs7136443  | A | C | 80             | 80               | 0   | AA             | CC     | AA  | HapMap |
| NA11830 | rs7136494  | T | A | 179            | 179              | 0   | TT             | AA     | TT  | HapMap |
| NA11830 | rs11065844 | A | C | 202            | 202              | 0   | AA             | CC     | AA  | HapMap |
| NA11830 | rs10160956 | G | A | 132            | 132              | 0   | GG             | AA     | GG  | HapMap |
| NA11830 | rs7976102  | C | G | 42             | 42               | 0   | CC             | GG     | CC  | HapMap |

| NA12874 | rs12099707 | C | G | 457              | 457 | 0   | CC             | CG     | CC  | HapMap |
|---------|------------|---|---|------------------|-----|-----|----------------|--------|-----|--------|
|         |            |   |   | Numbers of reads |     |     | Genotype calls |        |     |        |
| SAMPLE  | SNP        | R | A | Total coverage   | R   | A   | CapSeq         | HapMap | 1KG | ERROR  |
| NA12874 | rs11065857 | A | G | 558              | 558 | 0   | AA             | GG     | AA  | HapMap |
| NA12874 | rs7978923  | G | T | 301              | 157 | 144 | GT             | TT     | GT  | HapMap |
| NA12874 | rs4572196  | A | G | 588              | 588 | 0   | AA             | GG     | AA  | HapMap |
| NA12874 | rs10774624 | G | A | 210              | 111 | 99  | GA             | AA     | GA  | HapMap |
| NA12874 | rs668774   | G | C | 287              | 287 | 0   | GG             | CC     | GG  | HapMap |
| NA12874 | rs7953257  | A | T | 116              | 53  | 63  | AT             | TT     | AT  | HapMap |
| NA12874 | rs7136443  | A | C | 396              | 396 | 0   | AA             | CC     | AA  | HapMap |
| NA12874 | rs7136494  | T | A | 355              | 355 | 0   | TT             | AA     | TT  | HapMap |
| NA12874 | rs11065844 | A | C | 397              | 397 | 0   | AA             | CC     | AA  | HapMap |
| NA12874 | rs10160956 | G | A | 89               | 89  | 0   | GG             | AA     | GG  | HapMap |
| NA12874 | rs7976102  | C | G | 160              | 160 | 0   | CC             | GG     | CC  | HapMap |
| NA11881 | rs4766551  | C | T | 774              | 410 | 364 | CT             | CC     | CT  | HapMap |
| NA11881 | rs4766452  | T | C | 56               | 28  | 28  | TC             | TT     | TC  | HapMap |
| NA11881 | rs11065857 | A | G | 569              | 569 | 0   | AA             | GG     | AA  | HapMap |
| NA11881 | rs7978923  | G | T | 199              | 198 | 1   | GG             | TT     | GG  | HapMap |
| NA11881 | rs10774624 | G | A | 148              | 148 | 0   | GG             | AA     | GG  | HapMap |
| NA11881 | rs668774   | G | C | 189              | 189 | 0   | GG             | CC     | GG  | HapMap |
| NA11881 | rs7953257  | A | T | 52               | 52  | 0   | AA             | TT     | AA  | HapMap |
| NA11881 | rs7136443  | A | C | 148              | 148 | 0   | AA             | CC     | AA  | HapMap |
| NA11881 | rs11065844 | A | C | 323              | 323 | 0   | AA             | CC     | AA  | HapMap |
| NA11881 | rs10160956 | G | A | 102              | 102 | 0   | GG             | AA     | GG  | HapMap |
| NA11881 | rs7976102  | C | G | 79               | 79  | 0   | CC             | GG     | CC  | HapMap |
| NA12144 | rs11065857 | A | G | 211              | 211 | 0   | AA             | GG     | AA  | HapMap |
| NA12144 | rs7978923  | G | T | 99               | 97  | 2   | GG             | TT     | GG  | HapMap |
| NA12144 | rs4572196  | A | G | 254              | 254 | 0   | AA             | GG     | AA  | HapMap |
| NA12144 | rs10774624 | G | A | 29               | 29  | 0   | GG             | AA     | GG  | HapMap |

| SAMPLE  | SNP        | R | A | Total coverage | Numbers of reads |    | Genotype calls |        |     | ERROR  |
|---------|------------|---|---|----------------|------------------|----|----------------|--------|-----|--------|
|         |            |   |   |                | R                | A  | CapSeq         | HapMap | 1KG |        |
| NA12144 | rs12371484 | T | C | 143            | 71               | 72 | TC             | TT     | TC  | HapMap |
| NA12144 | rs668774   | G | C | 38             | 37               | 1  | GG             | CC     | GG  | HapMap |
| NA12144 | rs7953257  | A | T | 19             | 10               | 9  | AT             | TT     | AT  | HapMap |
| NA12144 | rs10850052 | C | A | 99             | 99               | 0  | CC             | AC     | CC  | HapMap |
| NA12144 | rs7136443  | A | C | 39             | 39               | 0  | AA             | CC     | AA  | HapMap |
| NA12144 | rs7136494  | T | A | 95             | 95               | 0  | TT             | AA     | TT  | HapMap |
| NA12144 | rs11065844 | A | C | 59             | 59               | 0  | AA             | CC     | AA  | HapMap |
| NA12144 | rs10160956 | G | A | 32             | 32               | 0  | GG             | AA     | GG  | HapMap |
| NA12144 | rs7976102  | C | G | 65             | 65               | 0  | CC             | GG     | CC  | HapMap |
| NA12762 | rs7978923  | G | T | 274            | 273              | 1  | GG             | TT     | GG  | HapMap |
| NA12762 | rs4572196  | A | G | 944            | 944              | 0  | AA             | GG     | AA  | HapMap |
| NA12762 | rs10774624 | G | A | 253            | 253              | 0  | GG             | AA     | GG  | HapMap |
| NA12762 | rs668774   | G | C | 352            | 351              | 1  | GG             | CC     | GG  | HapMap |
| NA12762 | rs7953257  | A | T | 144            | 144              | 0  | AA             | TT     | AA  | HapMap |
| NA12762 | rs7136494  | T | A | 392            | 392              | 0  | TT             | AA     | TT  | HapMap |
| NA12762 | rs11065844 | A | C | 222            | 222              | 0  | AA             | CC     | AA  | HapMap |
| NA12762 | rs10160956 | G | A | 118            | 118              | 0  | GG             | AA     | GG  | HapMap |
| NA12762 | rs7976102  | C | G | 204            | 204              | 0  | CC             | GG     | CC  | HapMap |

Table S6. Summary information of the parameters used on the simulations. Additive model ( $h = 0.5$ ) was used in all eight regions in addition to the same effective population size ( $N = 120,000$ ). The derived allele of each targeted SNP showed evidence of selection; however, frequency differences were observed. Therefore, different derived allele counts were simulated per region. Finally, the size of the locus with uniform recombination rate as well as the relative location of the targeted SNPs were also different within the observed data, so these differences were also accounted in the simulations.

| Parameters                                                                   | rs6822844  | rs3184504  | rs12913832 | rs4988235 | rs1426654 | rs16891982 | rs17810546 | rs2188962 |
|------------------------------------------------------------------------------|------------|------------|------------|-----------|-----------|------------|------------|-----------|
| $\mu$ : mean mutation rate (per bp per generation) (see Methods and Text S2) | 1.2E-08    | 1.2E-08    | 1.1E-08    | 1.5E-08   | 1.9E-8    | 1.7E-8     | 2.0E-8     | 1.6E-8    |
| $r$ : recombination rate (cM/bp)                                             | 4.0E-07    | 2.0E-07    | 8.0E-07    | 3.5E-7    | 11.6E-7   | 10.4E-7    | 10.8E-7    | 4.4E-7    |
| Derived alleles in the HapMap or CG sample                                   | 33         | 119        | 179        | 97        | 128       | 124        | 15         | 52        |
| HapMap or CG sample size                                                     | 226        | 220        | 226        | 128       | 128       | 128        | 128        | 128       |
| Number of chromosomes in CapSeq and CG data                                  | 28 and 128 | 28 and 128 | 28 and 128 | 128       | 128       | 128        | 128        | 128       |
| Number of derived alleles in our sample and CG data                          | 17 and 17  | 19 and 53  | 25 and 99  | 97        | 128       | 124        | 15         | 52        |
| Locus size of the subregion (kb) (see Figure S2)                             | 680        | 1,600      | 350        | 860       | 300       | 610        | 1,000      | 1,000     |
| Relative position of selected SNP                                            | 90%        | 30%        | 55%        | 58%       | 70%       | 19%        | 50%        | 50%       |

Table S7. Correlation among summary statistics (*SSs*) used for age (*t*) estimation. Simulation conditions are different among the 3 CapSeq regions studied (see Table S6), so 3 tables summarize the correlation among the three *SSs* used for allele age estimation (corrected for the age in order to exclude spurious correlations) as well as the correlation between each of them and the  $\log(t)$  for rs6822844, rs3184504 and rs12913832, respectively.

| rs6822844      |         |       |       |
|----------------|---------|-------|-------|
| Spearman's rho | $1/L_H$ | $M_H$ | $R_H$ |
| $\log(t)$      | 0.56    | 0.3   | -0.27 |
| $L_H$          |         | 0.53  | 0.16  |
| $M_H$          |         |       | -0.29 |

  

| rs3184504      |         |       |       |
|----------------|---------|-------|-------|
| Spearman's rho | $1/L_H$ | $M_H$ | $R_H$ |
| $\log(t)$      | 0.65    | 0.13  | -0.1  |
| $L_H$          |         | 0.39  | 0.31  |
| $M_H$          |         |       | -0.28 |

  

| rs12913832     |         |       |       |
|----------------|---------|-------|-------|
| Spearman's rho | $1/L_H$ | $M_H$ | $R_H$ |
| $\log(t)$      | 0.78    | 0.08  | 0.02  |
| $L_H$          |         | 0.38  | 0.18  |
| $M_H$          |         |       | -0.02 |
